# Supplementary material for: The role of TAp63γ and P53 point mutations in regulating DNA repair, mutational susceptibility and invasion of bladder cancer cells
Source: eLife journal article supplement (doi:10.7554/elife.71184), 2021-11-08

# BTT

Ta T1 T2 T3/T4  
Stage

KDa 70 -  
55 -  
RT4 1 33 8 54 55 56 26 31 73 61 10 62 63

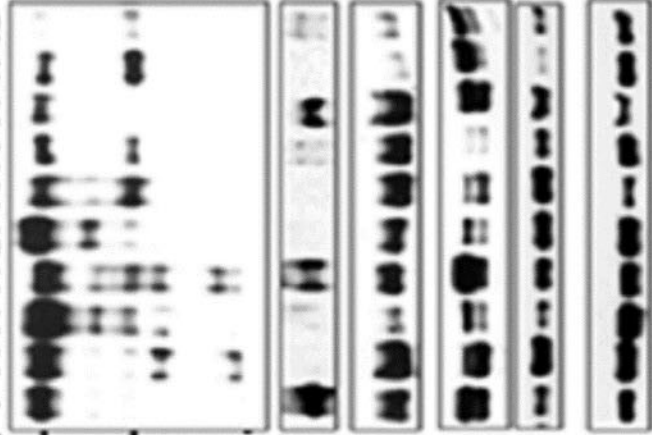

p63 (4A4)

XPC

XPA

hOGG<sub>1/2</sub>

Ref1

α-tubulin

Ta T1 T2 T3/T4

RT4 1 33 8 54 55 56 26 31 73 61 10 62 63

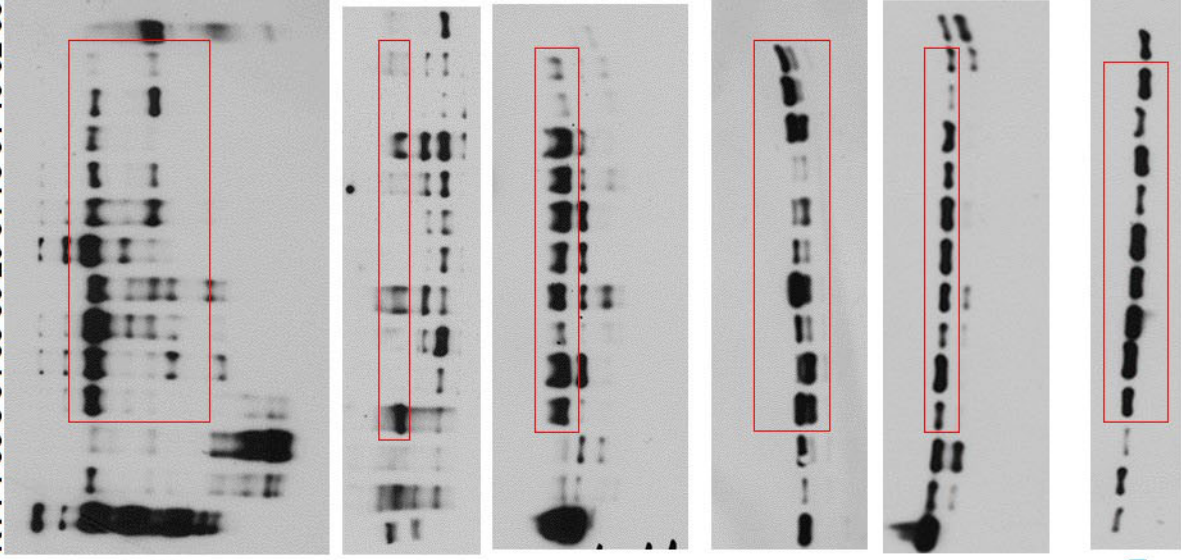

Supplement: fig5-data1 [file elife-71184-fig5-data1-v1.pdf]
